# Supplementary material
Source: PubMed Central journal article supplement (PMC3956507)
Supplement: viru-5-311-s01.pdf [file viru-5-311-s01.pdf]

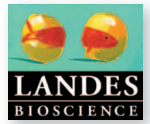

## Supplemental Material to:

Vikalp Vishwakarma, Niladri B Pati, Shilpa Ray,  
Susmita Das, and Mrutyunjay Suar

TTSS2-deficient *hha* mutant of *Salmonella* Typhimurium  
exhibits significant systemic attenuation in  
immunocompromised hosts

Virulence 2014; 5 (2)

<http://dx.doi.org/10.4161/viru.27605>

<http://www.landesbioscience.com/journals/virulence/article/27605/>

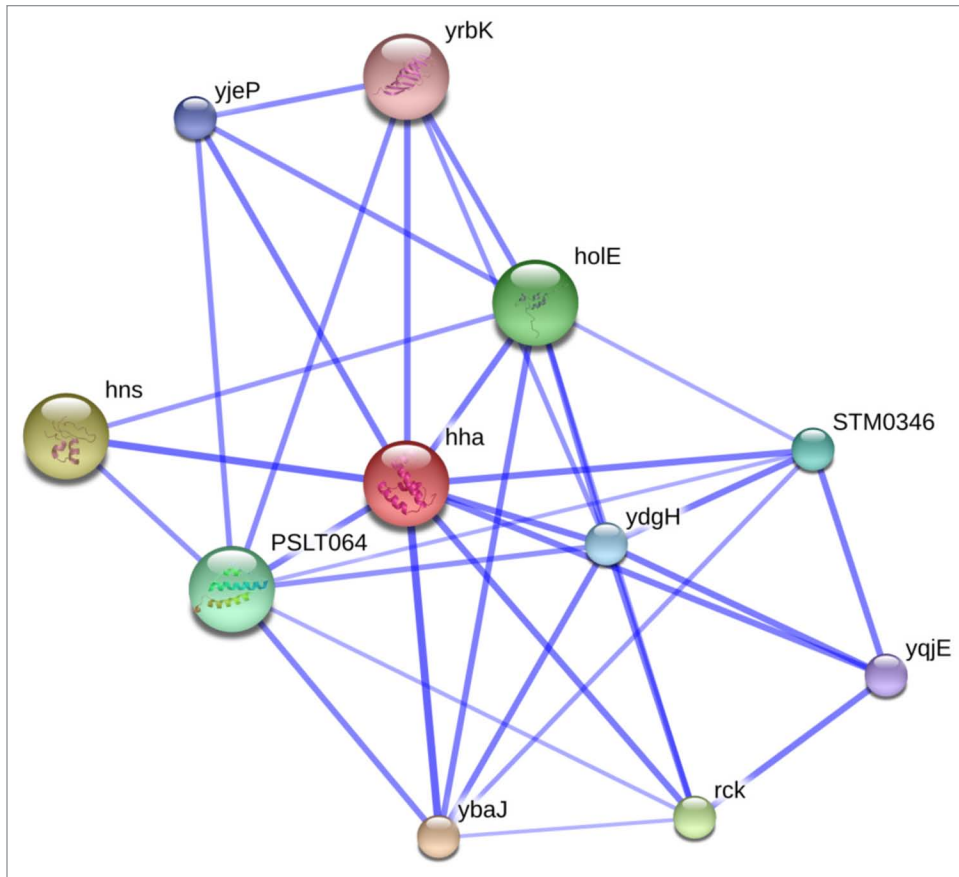

**Figure S1.** STRING tool (V 9.05) analysis for interaction of hha with other proteins of *Salmonella* Typhimurium LT2. yqjE, STM3230, putative inner membrane protein; yrbK, STM3317, hypothetical protein; STM0346, STM0346, putative outer membrane protein; hns, STM1751, global DNA-binding transcriptional dual regulator H-NS; hoIE, STM1876, DNA polymerase III subunit theta; PSLT064, PSLT064, putative inner membrane protein; rck, PSLT009, resistance to complement killing; ydgH, STM1478, putative periplasmic protein; ybaJ, STM0474, hypothetical protein; hha, STM0473, hemolysin expression-modulating protein; yjeP, STM4347, hypothetical protein.
